# Supplementary material for: Preparation of Mn-Doped Co3O4 Catalysts by an Eco-Friendly Solid-State Method for Catalytic Combustion of Low-Concentration Methane
Source: MDPI journal article supplement (doi:10.3390/catal13030529), 2023-03-05
Supplement: s1 [file s1]

## Supplementary Materials

# Preparation of Mn-Doped $\text{Co}_3\text{O}_4$ Catalysts by an Eco-Friendly Solid-State Method for Catalytic Combustion of Low-Concentration Methane

Linshuang Xue <sup>1</sup>, Chenyi Yuan <sup>1</sup>, Shipeng Wu <sup>1</sup>, Zhen Huang <sup>1,\*</sup>, Zhen Yan <sup>2</sup>, Stéphane Streiff <sup>2</sup>, Hualong Xu <sup>1</sup> and Wei Shen <sup>2,\*</sup>

<sup>1</sup> Department of Chemistry, Shanghai Key Laboratory of Molecular Catalysis and Innovative Materials, Laboratory of Advanced Materials and Collaborative Innovation Center of Chemistry for Energy Materials, Fudan University, Shanghai 200433, China

<sup>2</sup> Eco-Efficient Products and Processes Laboratory (E2P2L), UMI 3464 CNRS-Solvay, Shanghai 201108, China

\* Correspondence: [huangzhen@fudan.edu.cn](mailto:huangzhen@fudan.edu.cn) (Z.H.); [wshen@fudan.edu.cn](mailto:wshen@fudan.edu.cn) (W.S.)

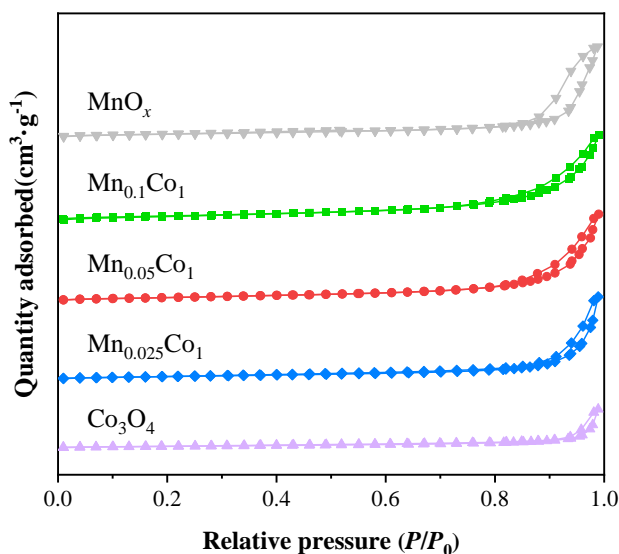

**Figure S1.**  $\text{N}_2$  adsorption–desorption isotherms of  $\text{Co}_3\text{O}_4$ ,  $\text{Mn}_x\text{Co}_1$  ( $x = 0.025, 0.05$ , and  $0.1$ ), and  $\text{MnO}_x$  catalysts.

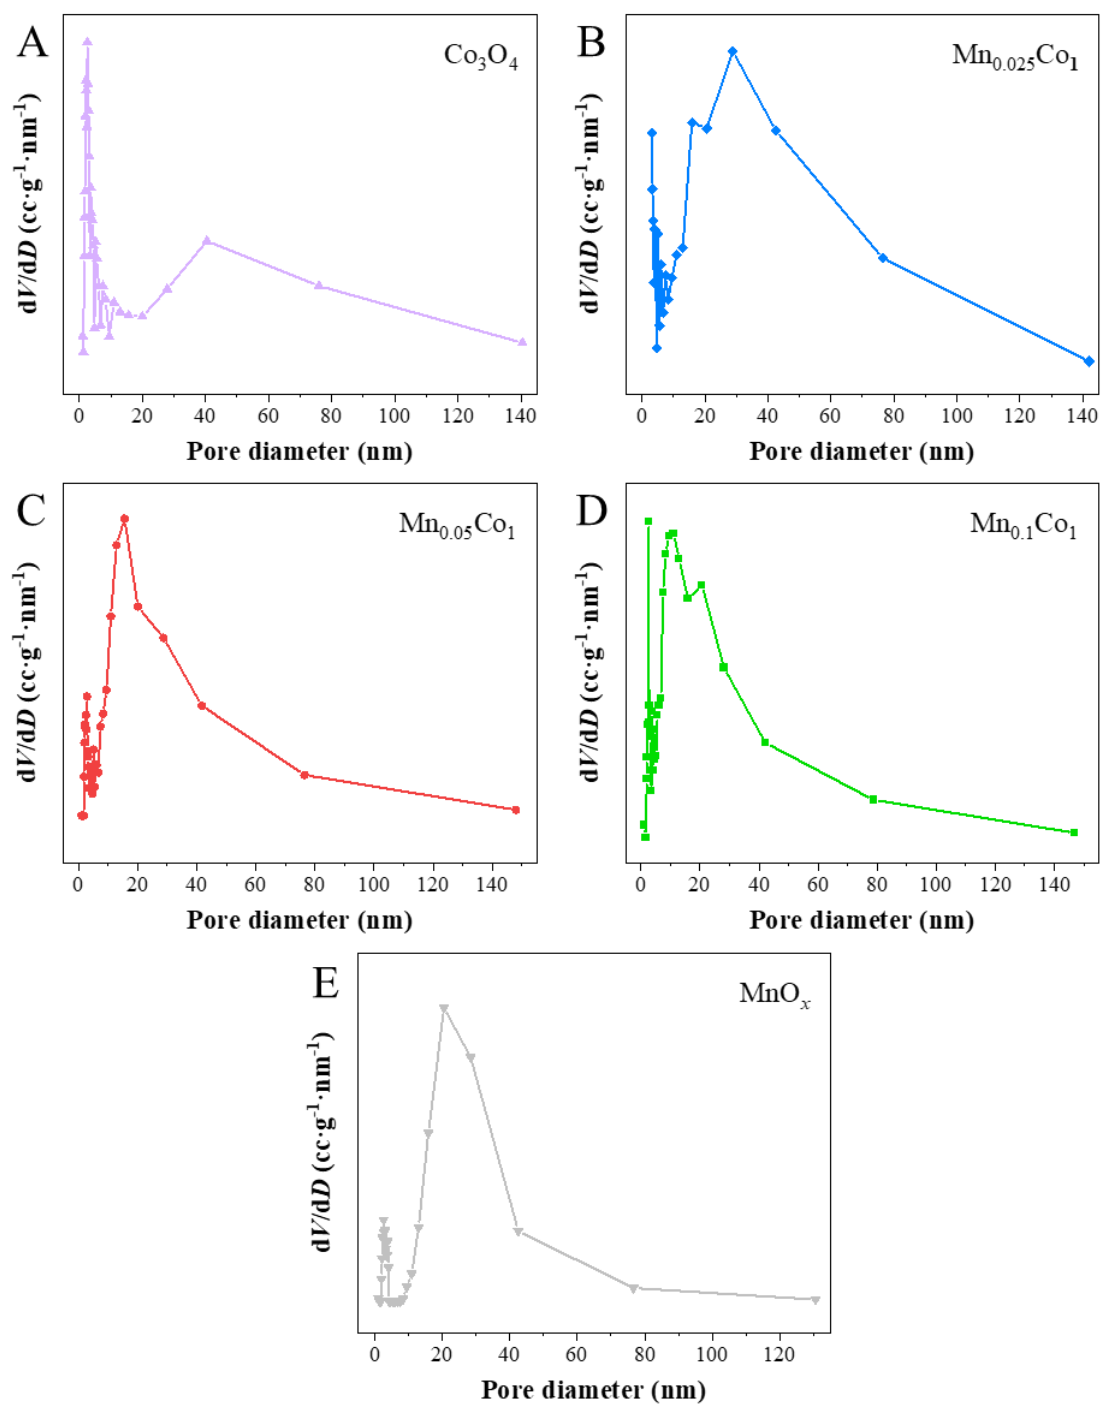

**Figure S2.** Pore size distribution profiles of (A)  $\text{Co}_3\text{O}_4$ , (B)  $\text{Mn}_{0.025}\text{Co}_1$ , (C)  $\text{Mn}_{0.05}\text{Co}_1$ , (D)  $\text{Mn}_{0.1}\text{Co}_1$ , and (E)  $\text{MnO}_x$  catalysts (Method: BJH desorption).

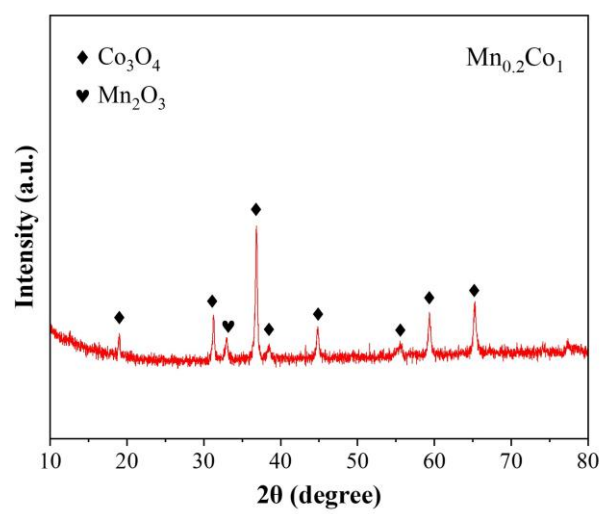

**Figure S3.** The XRD spectra of  $\text{Mn}_{0.2}\text{Co}_1$  catalyst.

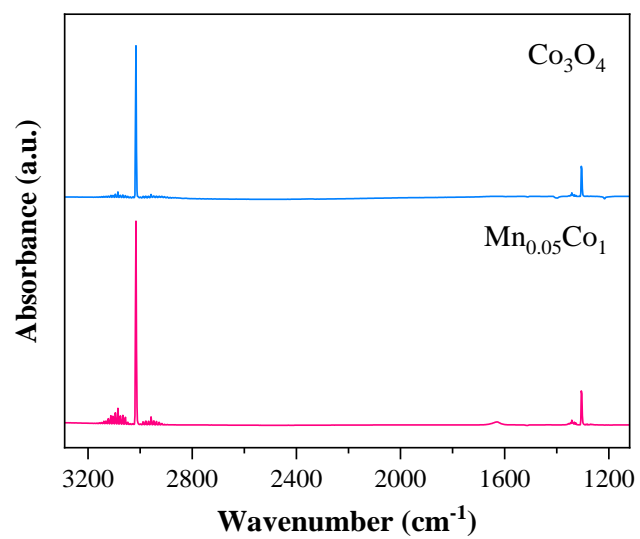

**Figure S4.** *In-situ* DRIFTS spectra of  $\text{Mn}_{0.05}\text{Co}_1$  and  $\text{Co}_3\text{O}_4$  catalysts after  $\text{CH}_4$  adsorption for 15 min.
